# Supplementary material for: Spatiotemporal evolution and transmission dynamics of Alpha and Delta SARS-CoV-2 variants contributing to sequential outbreaks in Cambodia during 2021
Source: PubMed Central journal article supplement — Commun Med (Lond). 2024 Nov 28;4:252. doi: 10.1038/s43856-024-00685-7 (PMC11603031; doi:10.1038/s43856-024-00685-7), 2024-11-28
Supplement: 43856_2024_685_MOESM2_ESM.pdf [file 43856_2024_685_MOESM2_ESM.pdf]

## Description of Additional Supplementary Files

**File name:** Supplementary Data 1

**File description:** Estimation of the effective reproductive number of the Alpha and Delta variants in Cambodia over time.

**File name:** Supplementary Data 2

**File description:** Trunk proportion for each location state over time in the Alpha variant.

**File name:** Supplementary Data 3

**File description:** Trunk proportion for each location state over time in the Delta variant.

**File name:** Supplementary Data 4

**File description:** List of samples from Cambodia used in this study, including GISA data and variant.

**File name:** Supplementary Data 5

**File description:** source data for six figures
